# Supplementary material for: Harsh environment-tolerant, superhydrophilic and underwater superoleophobic cellulose hydrogel-coated copper foam for efficient and repeatable oil/water separation
Source: Royal Society of Chemistry journal article supplement (doi:10.1039/d4nj03339f), 2024-01-01
Supplement: d4nj03339f7.pdf [file d4nj03339f7.pdf]

Electronic Supporting Information

**Harsh environmental-tolerant, superhydrophilic and  
underwater superoleophobic cellulose hydrogel-coated  
copper foam for efficient and repeatable oil/water  
separation**

Yichun Zhang <sup>a</sup>, Qinhan Shi <sup>a</sup>, Zhiguang Guo <sup>\*a,b</sup>

*<sup>a</sup> Ministry of Education Key Laboratory for the Green Preparation and Application of Functional Materials, Hubei University, Wuhan 430062, People's Republic of China.*

*<sup>b</sup> State Key Laboratory of Solid Lubrication, Lanzhou Institute of Chemical Physics, Chinese Academy of Sciences, Lanzhou 730000, People's Republic of China.*

*E-mail: zguo@licp.cas.cn; Fax: +86-931-8277088; Tel.: +86-931-4968105*

**Electronic Supplementary Movies:**

Movie S1: Water wetting process of copper foam in air.

Movie S2: Water wetting process of copper foam@cellulose in air.

Movie S3: Underwater oil resistance test of copper foam@cellulose.

Movie S4: Gravity-driven separation experiments of n-hexane/water mixtures.

Movie S5: Water wetting process of copper foam@cellulose after 15 wear cycles in air.

Movie S6: Water wetting process of copper foam@cellulose after 30 wear cycles in air.
